# Supplementary material for: Inspecting the structural characteristics of chiral drug penicillamine under different pH conditions using Raman optical activity spectroscopy and DFT calculations
Source: Royal Society of Chemistry journal article supplement (doi:10.1039/d1cp02219a), 2021-01-01
Supplement: d1cp02219a1.pdf [file d1cp02219a1.pdf]

## Supporting Information

# Inspecting the structural characteristics of chiral drug penicillamine under different pH conditions by Raman Optical Activity spectroscopy and DFT calculations

Yu-Ting Guo,<sup>a</sup> Yuan-Hui Xiao,<sup>a</sup> Ji-Guang Zhang,<sup>a</sup> Si-Da Bian,<sup>a</sup> Jian-Zhang Zhou,<sup>\* a</sup>  
De-Yin Wu<sup>a</sup> and Zhong-Qun Tian<sup>a</sup>

- **Part 1:**The atomic coordinates of the optimized structural models of D-penicillamine under different pH conditions ( $P_N^I$ 、 $P_N^{II}$ 、 $P_C^I$ 、 $P_C^{II}$ 、 $P_H^I$ 、 $P_H^{II}$ )
- **Figure S1.** Optimized conformations of L-penicillamine in H<sub>2</sub>O
- **Figure S2.** Optimized conformations of D- and L-penicillamine in H<sub>2</sub>O under different pH conditions
- **Figure S3.** Raman and ROA theoretical spectra corresponding to the six stable conformations of penicillamine in H<sub>2</sub>O
- **Figure S4.** Correspondence peaks between experimental and simulated Raman (D-Pen) and ROA spectra (D-Pen & L-Pen)
- **Figure S5.** Experimental and theoretical Raman& ROA spectra of penicillamine in H<sub>2</sub>O
- **Figure S6.** Raman and ROA spectra of D-penicillamine in H<sub>2</sub>O and D<sub>2</sub>O
- **Figure S7.** The theoretical Raman and ROA spectra of penicillamine under different pH conditions
- **Figure S8.** The theoretical ROA spectra of the D- and L-penicillamine using B3LYP/aug-cc-PVDZ and B3LYP/aug-cc-PVTZ
- **Figure S9.** The theoretical Raman and ROA spectra of the D-penicillamine with and without dispersion correction
- **Figure S10.** Optimized conformations of D- and L-penicillamine with implicit

solvation model (SMD) and explicit water molecules in H<sub>2</sub>O.

- **Figure S11.** The theoretical Raman and ROA spectra of D- and L-penicillamine with different solvation models in H<sub>2</sub>O.
- **Table S1.** Dihedral angles of theoretical six conformations of L-penicillamine
- **Table S2.**  $\Delta G$  and Boltzmann distributions of theoretical conformations of penicillamine under different pH conditions
- **Table S3.** Assignment of vibrational modes of penicillamine in H<sub>2</sub>O

**Part one:** The atomic coordinates of the optimized structural models of D-penicillamine (pH<1.9):

**P<sub>N</sub><sup>I</sup>:**

|   |          |          |          |
|---|----------|----------|----------|
| C | -0.51615 | -0.38198 | -0.53597 |
| C | -1.60216 | 0.63424  | -0.0601  |
| C | 0.86216  | -0.3434  | 0.17935  |
| O | -2.754   | 0.15036  | 0.14647  |
| O | -1.27585 | 1.84484  | 0.03687  |
| N | -1.14942 | -1.75002 | -0.43048 |
| H | -2.16826 | -1.56696 | -0.38399 |
| H | -0.91547 | -2.34649 | -1.22699 |
| C | 0.71879  | -0.29447 | 1.70545  |
| H | 0.20787  | 0.61786  | 2.03434  |
| H | 1.70817  | -0.32863 | 2.17654  |
| H | 0.14548  | -1.16052 | 2.0725   |
| C | 1.72501  | -1.5424  | -0.24929 |
| H | 1.76096  | -1.64528 | -1.34151 |
| H | 2.75003  | -1.41706 | 0.1225   |
| H | 1.34253  | -2.47791 | 0.18054  |
| S | 1.8008   | 1.16325  | -0.43206 |
| H | -0.36641 | -0.21251 | -1.6078  |
| H | 0.77195  | 2.02953  | -0.22897 |
| H | -0.89087 | -2.24737 | 0.42574  |
| H | -3.86047 | 0.89352  | 0.       |

**P<sub>N</sub><sup>II</sup>:**

|   |          |          |          |
|---|----------|----------|----------|
| C | 0.53625  | 0.47597  | -0.49478 |
| C | 1.52021  | -0.63228 | -0.05014 |
| C | -0.87679 | 0.35739  | 0.15879  |
| O | 2.80699  | -0.24332 | -0.04902 |
| O | 1.18534  | -1.75705 | 0.23568  |
| H | 2.78847  | 0.71739  | -0.26272 |
| N | 1.21064  | 1.77737  | -0.3351  |
| H | 0.86308  | 2.46786  | -0.99238 |
| H | 1.09177  | 2.15585  | 0.60191  |
| C | -0.7984  | 0.35492  | 1.69238  |
| H | -0.24406 | -0.5141  | 2.06183  |
| H | -1.80728 | 0.32389  | 2.12136  |
| H | -0.31058 | 1.27103  | 2.06555  |
| C | -1.76001 | 1.51307  | -0.33345 |
| H | -1.81013 | 1.54369  | -1.43024 |
| H | -2.78074 | 1.40445  | 0.05414  |

|   |          |          |          |
|---|----------|----------|----------|
| H | -1.37857 | 2.47917  | 0.02681  |
| S | -1.63096 | -1.26654 | -0.43573 |
| H | 0.40745  | 0.31805  | -1.57589 |
| H | -2.86474 | -0.75573 | -0.68308 |
| H | 2.30926  | 2.0845   | -0.29551 |

**P<sub>C</sub><sup>I</sup>:**

|   |          |          |          |
|---|----------|----------|----------|
| C | -1.79239 | 0.16123  | -0.10701 |
| O | -2.02176 | 1.31972  | 0.15381  |
| O | -2.79813 | -0.73826 | -0.29268 |
| H | -3.63171 | -0.25613 | -0.1661  |
| C | -0.42703 | -0.49776 | -0.33464 |
| C | 0.78055  | 0.40692  | 0.05524  |
| H | -0.37633 | -0.63232 | -1.43393 |
| N | -0.39724 | -1.77996 | 0.38017  |
| H | -1.26328 | -2.2889  | 0.23036  |
| H | 0.35782  | -2.34871 | 0.00573  |
| C | 0.86903  | 1.63716  | -0.86091 |
| H | 0.92904  | 1.34637  | -1.91945 |
| H | 1.76502  | 2.22157  | -0.61821 |
| H | -0.0125  | 2.2721   | -0.72333 |
| C | 0.77069  | 0.80482  | 1.53451  |
| H | 1.69412  | 1.33944  | 1.78674  |
| H | 0.68548  | -0.07933 | 2.17714  |
| H | -0.08128 | 1.46635  | 1.73644  |
| S | 2.18981  | -0.45831 | -0.2815  |
| H | 2.19217  | -1.23045 | 0.8336   |
| H | -0.28543 | -1.63025 | 1.40038  |

**P<sub>C</sub><sup>II</sup>:**

|   |          |          |          |
|---|----------|----------|----------|
| C | -1.80058 | 0.15734  | -0.20694 |
| O | -2.24033 | 1.22389  | -0.587   |
| O | -2.48536 | -0.71562 | 0.54749  |
| C | -0.40091 | -0.33824 | -0.572   |
| C | 0.75105  | 0.43273  | 0.15958  |
| H | -0.29187 | -0.18641 | -1.65071 |
| N | -0.32199 | -1.82029 | -0.35611 |
| H | -0.41191 | -2.0831  | 0.63114  |
| H | -1.06495 | -2.30377 | -0.87222 |
| C | 0.86284  | 1.84734  | -0.42466 |
| H | 1.0643   | 1.82368  | -1.50379 |
| H | 1.67727  | 2.38498  | 0.07462  |
| H | -0.06795 | 2.40225  | -0.26182 |
| C | 0.56348  | 0.47695  | 1.67877  |

|   |          |          |          |
|---|----------|----------|----------|
| H | 1.41951  | 0.97778  | 2.144    |
| H | 0.46693  | -0.52055 | 2.1256   |
| H | -0.339   | 1.05373  | 1.92475  |
| S | 2.38469  | -0.40536 | -0.27214 |
| H | 2.404    | -1.2999  | 0.75333  |
| H | 0.58368  | -2.1642  | -0.70067 |
| H | -3.39086 | -0.37959 | 0.69032  |

**P<sub>H</sub><sup>I</sup>:**

|   |          |          |          |
|---|----------|----------|----------|
| C | -1.68484 | -0.01165 | -0.04591 |
| O | -2.08617 | -1.02495 | 0.49638  |
| O | -2.25779 | 1.18796  | 0.07395  |
| H | -3.00009 | 1.12459  | 0.70361  |
| C | -0.40526 | -0.25353 | -0.8419  |
| C | 0.90766  | 0.34094  | -0.23105 |
| H | -0.71029 | 0.2429   | -1.75832 |
| N | -0.30583 | -1.71673 | -1.15025 |
| H | -1.25671 | -1.97848 | -1.43473 |
| H | 0.2975   | -1.80902 | -1.97402 |
| C | 2.01391  | 0.35545  | -1.29441 |
| H | 2.92533  | 0.79103  | -0.8697  |
| H | 1.69219  | 0.97602  | -2.14226 |
| H | 2.26689  | -0.6429  | -1.67357 |
| C | 0.66676  | 1.76876  | 0.28035  |
| H | 1.61583  | 2.24901  | 0.5438   |
| H | 0.20277  | 2.34062  | -0.53357 |
| H | 0.00594  | 1.81042  | 1.15434  |
| S | 1.4581   | -0.65449 | 1.26484  |
| H | 2.1655   | -1.60102 | 0.59249  |
| H | 0.00519  | -2.3936  | -0.44143 |

**P<sub>H</sub><sup>II</sup>:**

|   |          |          |          |
|---|----------|----------|----------|
| C | -1.68499 | 0.19849  | -0.00803 |
| O | -2.29473 | 1.24537  | 0.04738  |
| O | -2.08083 | -0.9041  | 0.6741   |
| H | -2.86793 | -0.64991 | 1.18324  |
| C | -0.43092 | -0.02826 | -0.86061 |
| C | 0.88816  | 0.4199   | -0.14094 |
| H | -0.55405 | 0.66929  | -1.7012  |
| N | -0.2998  | -1.37376 | -1.41218 |
| H | -1.02109 | -1.54884 | -2.10644 |
| H | -0.41854 | -2.06687 | -0.67691 |
| C | 2.00011  | 0.53868  | -1.19206 |
| H | 2.95357  | 0.78336  | -0.70942 |

|   |         |          |          |
|---|---------|----------|----------|
| H | 1.75394 | 1.34394  | -1.90144 |
| H | 2.1122  | -0.39316 | -1.75692 |
| C | 0.71552 | 1.7566   | 0.59415  |
| H | 1.6851  | 2.09451  | 0.97946  |
| H | 0.32718 | 2.51816  | -0.09527 |
| H | 0.01697 | 1.68677  | 1.43653  |
| S | 1.39738 | -0.81742 | 1.17369  |
| H | 1.83038 | -1.78481 | 0.32781  |
| H | 0.55902 | -1.35968 | -1.82496 |

The atomic coordinates of the optimized structural models of D-penicillamine ( $1.9 \leq \text{pH} < 7.9$ ):

**P<sub>N</sub><sup>I</sup>:**

|   |          |          |          |
|---|----------|----------|----------|
| C | 0.38581  | 0.45763  | -0.30424 |
| C | 1.69955  | -0.53333 | -0.05903 |
| C | -0.86566 | 0.34263  | 0.17509  |
| O | 2.79436  | -0.06344 | 0.36992  |
| O | 1.40376  | -1.75121 | -0.16319 |
| N | 0.77515  | 1.90485  | -0.52012 |
| H | 1.8004   | 1.83592  | -0.39121 |
| H | 0.54107  | 2.33484  | -1.41751 |
| C | -1.20287 | 0.93344  | 2.03449  |
| H | -0.48467 | 0.22103  | 2.45668  |
| H | -2.20569 | 0.66937  | 2.39016  |
| H | -0.96601 | 1.93569  | 2.42535  |
| C | -2.14253 | 1.17189  | -0.33211 |
| H | -2.76871 | 0.82993  | -1.16625 |
| H | -2.77946 | 1.29523  | 0.55321  |
| H | -1.74007 | 2.16419  | -0.57656 |
| S | -1.58039 | -1.45433 | -0.1996  |
| H | 0.02705  | 0.0181   | -1.24088 |
| H | -0.41036 | -2.1024  | -0.44798 |
| H | 0.41776  | 2.50706  | 0.22639  |

**P<sub>N</sub><sup>II</sup>:**

|   |          |          |          |
|---|----------|----------|----------|
| C | 0.53949  | 0.38002  | -0.536   |
| C | 1.58807  | -0.66773 | -0.06129 |
| C | -0.84476 | 0.36243  | 0.16717  |
| O | 2.75574  | -0.22482 | 0.15942  |
| O | 1.20711  | -1.85998 | 0.01801  |
| N | 1.19852  | 1.73246  | -0.41294 |
| H | 0.97665  | 2.34546  | -1.20055 |
| H | 0.94989  | 2.22031  | 0.45228  |
| C | -0.71771 | 0.39144  | 1.69499  |
| H | -0.1632  | -0.47588 | 2.07104  |
| H | -1.71423 | 0.39283  | 2.15259  |
| H | -0.20124 | 1.3049   | 2.02914  |
| C | -1.69718 | 1.53869  | -0.33308 |
| H | -1.76528 | 1.55024  | -1.42828 |
| H | -2.71092 | 1.47367  | 0.08098  |
| H | -1.27673 | 2.49741  | 0.00201  |
| S | -1.69155 | -1.23974 | -0.3674  |
| H | 0.39476  | 0.22119  | -1.61038 |

|   |          |          |          |
|---|----------|----------|----------|
| H | -2.93811 | -0.70134 | -0.42121 |
| H | 2.21332  | 1.52905  | -0.36865 |

**P<sub>C</sub><sup>I</sup>:**

|   |          |          |          |
|---|----------|----------|----------|
| C | -1.87275 | 0.10801  | -0.16381 |
| O | -2.33087 | 1.13105  | -0.73538 |
| O | -2.45248 | -0.60507 | 0.70379  |
| C | -0.43782 | -0.33681 | -0.57653 |
| C | 0.69738  | 0.38921  | 0.20326  |
| H | -0.30681 | -0.16141 | -1.64747 |
| N | -0.37362 | -1.82319 | -0.37139 |
| H | -0.79689 | -2.05338 | 0.53648  |
| H | -0.92448 | -2.30258 | -1.08967 |
| C | 0.6787   | 1.88576  | -0.13197 |
| H | 0.75466  | 2.06147  | -1.21309 |
| H | 1.51808  | 2.38641  | 0.36464  |
| H | -0.25333 | 2.34052  | 0.22292  |
| C | 0.62274  | 0.16708  | 1.71692  |
| H | 1.46214  | 0.67075  | 2.21021  |
| H | 0.65823  | -0.89607 | 1.9893   |
| H | -0.30962 | 0.59194  | 2.11187  |
| S | 2.36309  | -0.24789 | -0.4373  |
| H | 2.55377  | -1.21663 | 0.49619  |
| H | 0.58749  | -2.1797  | -0.41932 |

**P<sub>C</sub><sup>II</sup>:**

|   |          |          |          |
|---|----------|----------|----------|
| C | -1.87028 | 0.10724  | -0.17554 |
| O | -2.32019 | 1.12004  | -0.76938 |
| O | -2.45849 | -0.59203 | 0.69761  |
| C | -0.4318  | -0.34897 | -0.5646  |
| C | 0.69535  | 0.39602  | 0.20839  |
| H | -0.2977  | -0.20047 | -1.63998 |
| N | -0.36209 | -1.82823 | -0.31034 |
| H | -0.90444 | -2.03144 | 0.54077  |
| H | -0.79223 | -2.3473  | -1.08091 |
| C | 0.64475  | 1.89842  | -0.08729 |
| H | 0.65942  | 2.09778  | -1.16593 |
| H | 1.51149  | 2.39067  | 0.36934  |
| H | -0.26449 | 2.34287  | 0.3366   |
| C | 0.65174  | 0.13728  | 1.7183   |
| H | 1.48311  | 0.65681  | 2.21004  |
| H | 0.72155  | -0.92795 | 1.97138  |
| H | -0.28491 | 0.53065  | 2.13488  |
| S | 2.15869  | -0.04397 | -0.60388 |



|   |         |          |          |
|---|---------|----------|----------|
| H | 2.97075 | 0.84738  | 0.01748  |
| H | 0.60989 | -2.14688 | -0.20803 |

**P<sub>H</sub><sup>I</sup>:**

|   |          |          |          |
|---|----------|----------|----------|
| C | 1.70245  | -0.35154 | -0.09306 |
| O | 2.55613  | 0.34388  | 0.53633  |
| O | 1.77657  | -1.57856 | -0.34469 |
| C | 0.48078  | 0.43099  | -0.66378 |
| C | -0.94065 | -0.09716 | -0.3394  |
| H | 0.59025  | 0.43675  | -1.7556  |
| N | 0.65425  | 1.86178  | -0.22553 |
| H | 1.64095  | 1.92478  | 0.08726  |
| H | 0.45649  | 2.52929  | -0.97443 |
| C | -2.00451 | 0.88005  | -0.86185 |
| H | -3.00537 | 0.47099  | -0.68204 |
| H | -1.87365 | 1.01106  | -1.94595 |
| H | -1.95843 | 1.86907  | -0.38947 |
| C | -1.17405 | -1.475   | -0.97488 |
| H | -2.22681 | -1.75657 | -0.85135 |
| H | -0.95288 | -1.42354 | -2.04991 |
| H | -0.54346 | -2.25189 | -0.53488 |
| S | -1.14161 | -0.33245 | 1.52111  |
| H | -1.5572  | 0.92666  | 1.82107  |
| H | 0.07048  | 2.10363  | 0.58092  |

**P<sub>H</sub><sup>II</sup>:**

|   |          |          |          |
|---|----------|----------|----------|
| C | -1.68499 | 0.19849  | -0.00803 |
| O | -2.29473 | 1.24537  | 0.04738  |
| O | -2.08083 | -0.9041  | 0.6741   |
| C | -0.43092 | -0.02826 | -0.86061 |
| C | 0.88816  | 0.4199   | -0.14094 |
| H | -0.55405 | 0.66929  | -1.7012  |
| N | -0.2998  | -1.37376 | -1.41218 |
| H | -1.02109 | -1.54884 | -2.10644 |
| H | -0.41854 | -2.06687 | -0.67691 |
| C | 2.00011  | 0.53868  | -1.19206 |
| H | 2.95357  | 0.78336  | -0.70942 |
| H | 1.75394  | 1.34394  | -1.90144 |
| H | 2.1122   | -0.39316 | -1.75692 |
| C | 0.76155  | 1.96498  | 0.09806  |
| H | 1.58041  | 2.45103  | 0.6421   |
| H | 0.53164  | 2.56069  | -0.79544 |
| H | -0.12848 | 1.97333  | 0.73853  |
| S | 1.37024  | -0.75145 | 1.1036   |

|   |         |          |          |
|---|---------|----------|----------|
| H | 2.75122 | -0.90885 | 0.58936  |
| H | 0.57023 | -1.76047 | -1.78069 |

The atomic coordinates of the optimized structural models of D-penicillamine ( $7.9 \leq \text{pH} < 10.7$ ):

**P<sub>N</sub><sup>I</sup>:**

|   |          |          |          |
|---|----------|----------|----------|
| C | -0.51615 | -0.38198 | -0.53597 |
| C | -1.60216 | 0.63424  | -0.0601  |
| C | 0.86216  | -0.3434  | 0.17935  |
| O | -2.754   | 0.15036  | 0.14647  |
| O | -1.27585 | 1.84484  | 0.03687  |
| N | -1.14942 | -1.75002 | -0.43048 |
| H | -0.91547 | -2.34649 | -1.22699 |
| C | 0.71879  | -0.29447 | 1.70545  |
| H | 0.20787  | 0.61786  | 2.03434  |
| H | 1.70817  | -0.32863 | 2.17654  |
| H | 0.14548  | -1.16052 | 2.0725   |
| C | 1.72501  | -1.5424  | -0.24929 |
| H | 1.76096  | -1.64528 | -1.34151 |
| H | 2.75003  | -1.41706 | 0.1225   |
| H | 1.34253  | -2.47791 | 0.18054  |
| S | 1.8008   | 1.16325  | -0.43206 |
| H | -0.36641 | -0.21251 | -1.6078  |
| H | 0.77195  | 2.02953  | -0.22897 |
| H | -0.89087 | -2.24737 | 0.42574  |

**P<sub>N</sub><sup>II</sup>:**

|   |          |          |          |
|---|----------|----------|----------|
| C | 0.45461  | 0.21943  | -0.58959 |
| C | 1.50319  | -0.82832 | -0.11487 |
| C | -0.92964 | 0.20184  | 0.11358  |
| O | 2.67086  | -0.38542 | 0.10583  |
| O | 1.12223  | -2.02057 | -0.03558 |
| N | 1.11364  | 1.57186  | -0.46652 |
| H | 0.89178  | 2.18486  | -1.25413 |
| H | 0.86501  | 2.05971  | 0.39869  |
| C | -0.80259 | 0.23085  | 1.6414   |
| H | -0.24808 | -0.63647 | 2.01746  |
| H | -1.79911 | 0.23224  | 2.09901  |
| H | -0.28612 | 1.14431  | 1.97556  |
| C | -1.78206 | 1.3781   | -0.38666 |
| H | -1.85016 | 1.38964  | -1.48186 |
| H | -2.7958  | 1.31307  | 0.0274   |
| H | -1.36161 | 2.33682  | -0.05158 |
| S | -1.69155 | -1.23974 | -0.3674  |
| H | 0.30988  | 0.06059  | -1.66396 |
| H | -2.93811 | -0.70134 | -0.42121 |

**P<sub>C</sub><sup>I</sup>:**

|   |          |          |          |
|---|----------|----------|----------|
| C | -1.70574 | 0.04413  | -0.22804 |
| O | -2.16385 | 1.06717  | -0.7996  |
| O | -2.28547 | -0.66895 | 0.63956  |
| C | -0.2708  | -0.40069 | -0.64075 |
| C | 0.86439  | 0.32533  | 0.13903  |
| H | -0.1398  | -0.22529 | -1.71169 |
| N | -0.20661 | -1.88707 | -0.43562 |
| H | -0.62988 | -2.11726 | 0.47226  |
| H | -0.75746 | -2.36646 | -1.15389 |
| C | 0.84571  | 1.82188  | -0.19619 |
| H | 0.92167  | 1.99759  | -1.27732 |
| H | 1.68509  | 2.32253  | 0.30041  |
| H | -0.08632 | 2.27664  | 0.1587   |
| C | 0.78975  | 0.1032   | 1.65269  |
| H | 1.62915  | 0.60687  | 2.14598  |
| H | 0.82524  | -0.95995 | 1.92508  |
| H | -0.14261 | 0.52806  | 2.04764  |
| S | 2.36309  | -0.24789 | -0.4373  |
| H | 2.55377  | -1.21663 | 0.49619  |

**P<sub>C</sub><sup>II</sup>:**

|   |          |          |          |
|---|----------|----------|----------|
| C | -1.87038 | 0.10701  | -0.17543 |
| O | -2.32063 | 1.11966  | -0.76929 |
| O | -2.45829 | -0.59229 | 0.69789  |
| C | -0.43185 | -0.34885 | -0.56468 |
| C | 0.69529  | 0.39612  | 0.20839  |
| H | -0.29781 | -0.20002 | -1.64003 |
| N | -0.36176 | -1.82814 | -0.31094 |
| H | -0.90282 | -2.03185 | 0.54083  |
| H | -0.79289 | -2.34701 | -1.0811  |
| C | 0.64465  | 1.8985   | -0.08742 |
| H | 0.65991  | 2.09781  | -1.16607 |
| H | 1.51102  | 2.39093  | 0.36969  |
| H | -0.26496 | 2.3428   | 0.33584  |
| C | 0.65153  | 0.13745  | 1.7183   |
| H | 1.48288  | 0.65691  | 2.21013  |
| H | 0.72116  | -0.92779 | 1.97142  |
| H | -0.28514 | 0.53092  | 2.13474  |
| S | 2.3245   | -0.28539 | -0.49938 |
| H | 2.99444  | -0.3631  | 0.67758  |

**P<sub>H</sub><sup>I</sup>:**

|   |          |          |          |
|---|----------|----------|----------|
| C | 1.70245  | -0.35154 | -0.09306 |
| O | 2.55613  | 0.34388  | 0.53633  |
| O | 1.77657  | -1.57856 | -0.34469 |
| C | 0.48078  | 0.43099  | -0.66378 |
| C | -0.94065 | -0.09716 | -0.3394  |
| H | 0.59025  | 0.43675  | -1.7556  |
| N | 0.65425  | 1.86178  | -0.22553 |
| H | 0.45649  | 2.52929  | -0.97443 |
| C | -2.00451 | 0.88005  | -0.86185 |
| H | -3.00537 | 0.47099  | -0.68204 |
| H | -1.87365 | 1.01106  | -1.94595 |
| H | -1.95843 | 1.86907  | -0.38947 |
| C | -1.17405 | -1.475   | -0.97488 |
| H | -2.22681 | -1.75657 | -0.85135 |
| H | -0.95288 | -1.42354 | -2.04991 |
| H | -0.54346 | -2.25189 | -0.53488 |
| S | -1.14161 | -0.33245 | 1.52111  |
| H | -1.5572  | 0.92666  | 1.82107  |
| H | 0.07048  | 2.10363  | 0.58092  |

**P<sub>H</sub><sup>II</sup>:**

|   |          |          |          |
|---|----------|----------|----------|
| C | 1.7255   | 0.23036  | 0.08294  |
| O | 2.23189  | 1.24511  | 0.65307  |
| O | 2.10065  | -0.2242  | -1.03868 |
| C | 0.48397  | -0.46947 | 0.69616  |
| C | -0.90107 | 0.14702  | 0.32668  |
| H | 0.58281  | -0.2775  | 1.77829  |
| N | 0.96161  | -2.0091  | 0.84479  |
| H | 0.27278  | -2.62787 | 1.26418  |
| C | -2.02014 | -0.6649  | 0.99626  |
| H | -2.99852 | -0.22331 | 0.76659  |
| H | -1.88696 | -0.64745 | 2.08933  |
| H | -2.03154 | -1.70755 | 0.6612   |
| C | -1.02061 | 1.61294  | 0.75843  |
| H | -2.03883 | 1.97684  | 0.56604  |
| H | -0.8318  | 1.69732  | 1.83891  |
| H | -0.31298 | 2.26137  | 0.23393  |
| S | -1.10032 | 0.05027  | -1.58329 |
| H | -2.45033 | 0.17287  | -1.51283 |
| H | 0.91431  | -2.1503  | -0.16145 |

The atomic coordinates of the optimized structural models of D-penicillamine (pH  $\geq$  10.7):

**P<sub>N</sub><sup>I</sup>:**

|   |          |          |          |
|---|----------|----------|----------|
| C | -0.51615 | -0.38198 | -0.53597 |
| C | -1.60216 | 0.63424  | -0.0601  |
| C | 0.86216  | -0.3434  | 0.17935  |
| O | -2.754   | 0.15036  | 0.14647  |
| O | -1.27585 | 1.84484  | 0.03687  |
| N | -1.14942 | -1.75002 | -0.43048 |
| H | -0.91547 | -2.34649 | -1.22699 |
| C | 0.71879  | -0.29447 | 1.70545  |
| H | 0.20787  | 0.61786  | 2.03434  |
| H | 1.70817  | -0.32863 | 2.17654  |
| H | 0.14548  | -1.16052 | 2.0725   |
| C | 1.72501  | -1.5424  | -0.24929 |
| H | 1.76096  | -1.64528 | -1.34151 |
| H | 2.75003  | -1.41706 | 0.1225   |
| H | 1.34253  | -2.47791 | 0.18054  |
| S | 1.8008   | 1.16325  | -0.43206 |
| H | -0.36641 | -0.21251 | -1.6078  |
| H | -0.89087 | -2.24737 | 0.42574  |

**P<sub>N</sub><sup>II</sup>:**

|   |          |          |          |
|---|----------|----------|----------|
| C | 0.53625  | 0.47597  | -0.49478 |
| C | 1.52021  | -0.63228 | -0.05014 |
| C | -0.87679 | 0.35739  | 0.15879  |
| O | 2.80699  | -0.24332 | -0.04902 |
| O | 1.18534  | -1.75705 | 0.23568  |
| N | 1.21064  | 1.77737  | -0.3351  |
| H | 0.86308  | 2.46786  | -0.99238 |
| H | 1.09177  | 2.15585  | 0.60191  |
| C | -0.7984  | 0.35492  | 1.69238  |
| H | -0.24406 | -0.5141  | 2.06183  |
| H | -1.80728 | 0.32389  | 2.12136  |
| H | -0.31058 | 1.27103  | 2.06555  |
| C | -1.76001 | 1.51307  | -0.33345 |
| H | -1.81013 | 1.54369  | -1.43024 |
| H | -2.78074 | 1.40445  | 0.05414  |
| H | -1.37857 | 2.47917  | 0.02681  |
| S | -1.63096 | -1.26654 | -0.43573 |
| H | 0.40745  | 0.31805  | -1.57589 |

**P<sub>C</sub><sup>I</sup>:**

|   |          |          |          |
|---|----------|----------|----------|
| C | -1.62538 | 0.05869  | -0.14692 |
| O | -1.85475 | 1.21718  | 0.1139   |
| O | -2.63112 | -0.8408  | -0.33259 |
| C | -0.26002 | -0.60029 | -0.37455 |
| C | 0.94756  | 0.30438  | 0.01534  |
| H | -0.20932 | -0.73486 | -1.47383 |
| N | -0.23023 | -1.8825  | 0.34027  |
| H | -1.09627 | -2.39143 | 0.19045  |
| H | 0.52483  | -2.45124 | -0.03417 |
| C | 1.03603  | 1.53463  | -0.90081 |
| H | 1.09605  | 1.24383  | -1.95936 |
| H | 1.93203  | 2.11903  | -0.65812 |
| H | 0.15451  | 2.16956  | -0.76324 |
| C | 0.9377   | 0.70228  | 1.49461  |
| H | 1.86113  | 1.2369   | 1.74683  |
| H | 0.85248  | -0.18187 | 2.13724  |
| H | 0.08573  | 1.36381  | 1.69653  |
| S | 2.35682  | -0.56085 | -0.32141 |

**P<sub>C</sub><sup>II</sup>:**

|   |          |          |          |
|---|----------|----------|----------|
| C | -1.87038 | 0.10701  | -0.17543 |
| O | -2.32063 | 1.11966  | -0.76929 |
| O | -2.45829 | -0.59229 | 0.69789  |
| C | -0.43185 | -0.34885 | -0.56468 |
| C | 0.69529  | 0.39612  | 0.20839  |
| H | -0.29781 | -0.20002 | -1.64003 |
| N | -0.36176 | -1.82814 | -0.31094 |
| H | -0.90282 | -2.03185 | 0.54083  |
| H | -0.79289 | -2.34701 | -1.0811  |
| C | 0.64465  | 1.8985   | -0.08742 |
| H | 0.65991  | 2.09781  | -1.16607 |
| H | 1.51102  | 2.39093  | 0.36969  |
| H | -0.26496 | 2.3428   | 0.33584  |
| C | 0.65153  | 0.13745  | 1.7183   |
| H | 1.48288  | 0.65691  | 2.21013  |
| H | 0.72116  | -0.92779 | 1.97142  |
| H | -0.28514 | 0.53092  | 2.13474  |
| S | 2.3245   | -0.28539 | -0.49938 |

**P<sub>H</sub><sup>I</sup>:**

|   |         |          |          |
|---|---------|----------|----------|
| C | 1.64939 | -0.11206 | -0.08085 |
| O | 2.44386 | 0.49895  | 0.59985  |
| O | 1.83627 | -1.41046 | -0.41124 |

|   |          |          |          |
|---|----------|----------|----------|
| C | 0.40132  | 0.50554  | -0.71458 |
| C | -0.95571 | -0.1663  | -0.29932 |
| H | 0.50176  | 0.32462  | -1.80093 |
| N | 0.39594  | 1.93408  | -0.39996 |
| H | 1.29025  | 2.20566  | -0.00047 |
| H | 0.21716  | 2.50214  | -1.22029 |
| C | -2.10492 | 0.64583  | -0.91714 |
| H | -3.06738 | 0.19961  | -0.64093 |
| H | -2.02555 | 0.63914  | -2.01684 |
| H | -2.09289 | 1.68424  | -0.57102 |
| C | -1.07452 | -1.6287  | -0.75257 |
| H | -2.08665 | -1.99736 | -0.54199 |
| H | -0.90946 | -1.69776 | -1.8378  |
| H | -0.35544 | -2.28509 | -0.25606 |
| S | -1.11011 | -0.17191 | 1.56379  |

**P<sub>H</sub><sup>II</sup>:**

|   |          |          |          |
|---|----------|----------|----------|
| C | -1.68499 | 0.19849  | -0.00803 |
| O | -2.29473 | 1.24537  | 0.04738  |
| O | -2.08083 | -0.9041  | 0.6741   |
| C | -0.43092 | -0.02826 | -0.86061 |
| C | 0.88816  | 0.4199   | -0.14094 |
| H | -0.55405 | 0.66929  | -1.7012  |
| N | -0.2998  | -1.37376 | -1.41218 |
| H | -1.02109 | -1.54884 | -2.10644 |
| H | -0.41854 | -2.06687 | -0.67691 |
| C | 2.00011  | 0.53868  | -1.19206 |
| H | 2.95357  | 0.78336  | -0.70942 |
| H | 1.75394  | 1.34394  | -1.90144 |
| H | 2.1122   | -0.39316 | -1.75692 |
| C | 0.71552  | 1.7566   | 0.59415  |
| H | 1.6851   | 2.09451  | 0.97946  |
| H | 0.32718  | 2.51816  | -0.09527 |
| H | 0.01697  | 1.68677  | 1.43653  |
| S | 1.39738  | -0.81742 | 1.17369  |



The D-Pen and L-Pen mentioned there represent D-penicillamine and L-penicillamine.

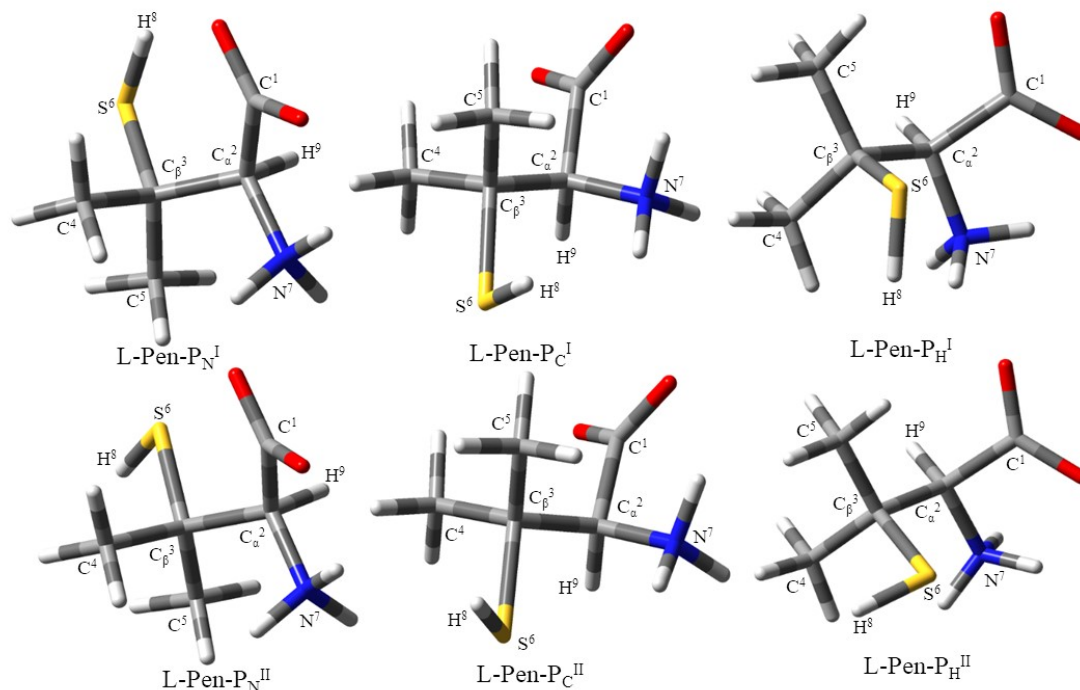

**Figure S1. Optimized conformations of L-penicillamine in H<sub>2</sub>O**

(The implicit SMD model is used for considering the solvent effects. The P<sub>N</sub>, P<sub>C</sub> and P<sub>H</sub> mean the sulfur atom in trans orientations with respect to amino groups, carboxylate and hydrogen, respectively. Because of the different orientations of SH, they are divided into P<sub>N</sub><sup>I</sup>, P<sub>N</sub><sup>II</sup>, P<sub>C</sub><sup>I</sup>, P<sub>C</sub><sup>II</sup>, P<sub>H</sub><sup>I</sup>, P<sub>H</sub><sup>II</sup>. In detail, there are twelve torsion angles are defined:  $\Psi_{a1}(C^1-C^2-C^3-C^5)$ ,  $\Psi_{a2}(C^1-C^2-C^3-C^4)$ ,  $\Psi_{a3}(C^1-C^2-C^3-S^6)$ ;  $\Psi_{b1}(N^7-C^2-C^3-C^5)$ ,  $\Psi_{b2}(N^7-C^2-C^3-C^4)$ ,  $\Psi_{b3}(N^7-C^2-C^3-S^6)$ ;  $\Psi_{c1}(H^9-C^2-C^3-C^5)$ ,  $\Psi_{c2}(H^9-C^2-C^3-C^4)$ ,  $\Psi_{c3}(H^9-C^2-C^3-S^6)$ ;  $\Psi_{d1}(H^8-S^6-C^3-C^2)$ ,  $\Psi_{d2}(H^8-S^6-C^3-C^5)$ ,  $\Psi_{d3}(H^8-S^6-C^3-C^4)$ )

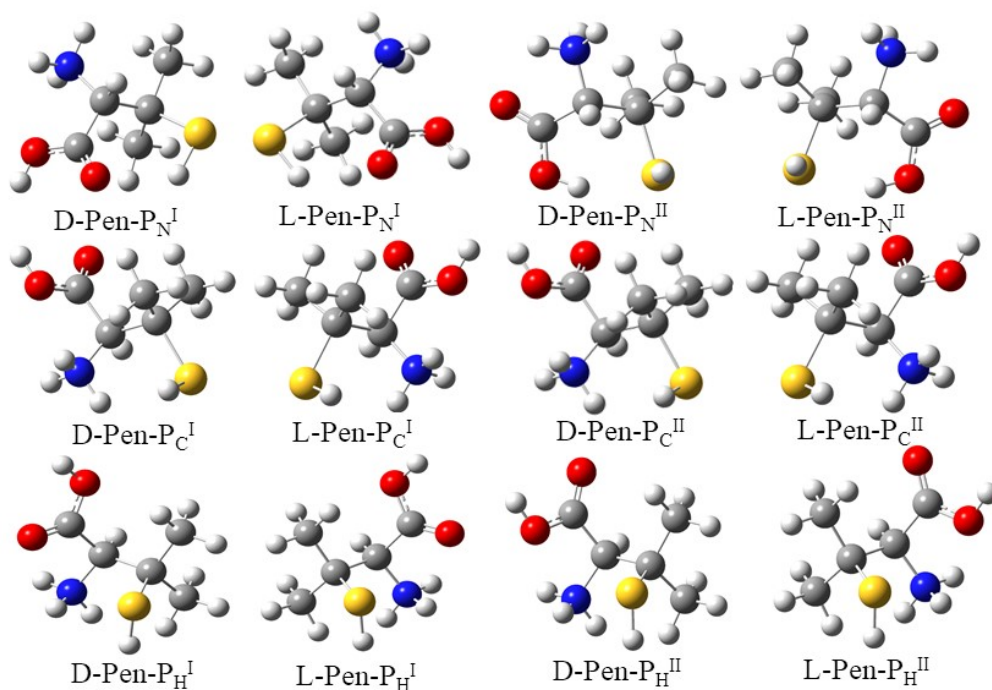

**pH < 1.9 (Cation state)**

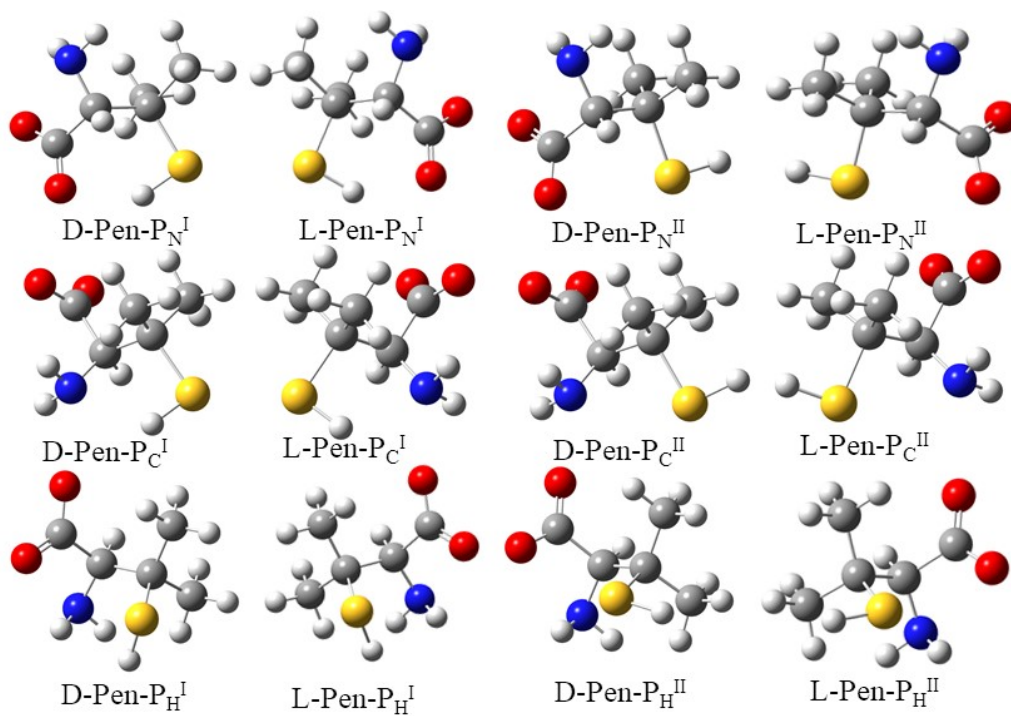

**7.9 ≤ pH < 10.7 (Monovalent anion)**

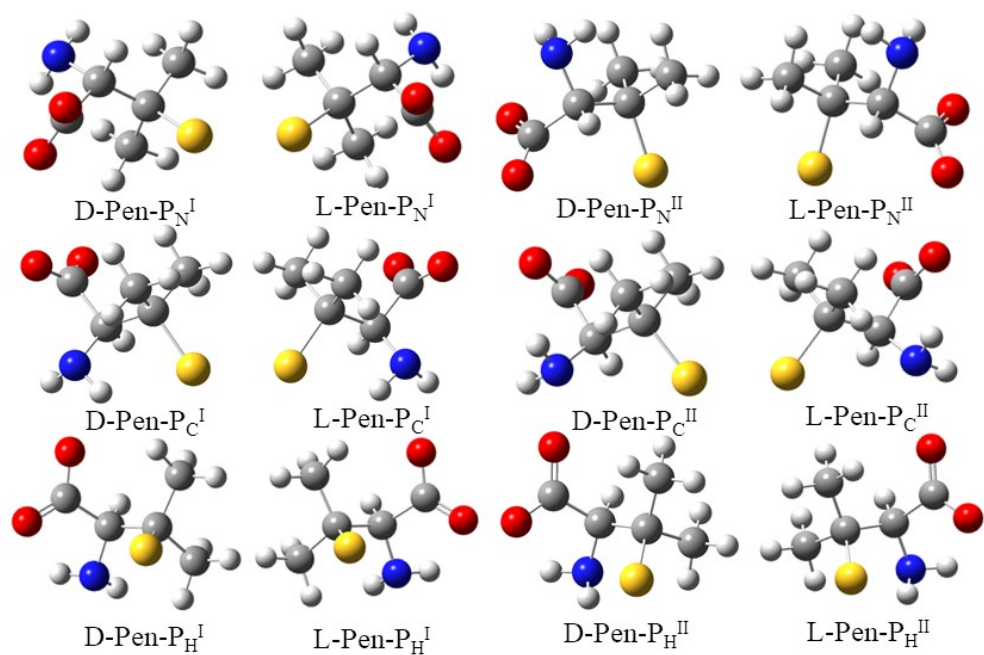

$\text{pH} \geq 10.7$  (Dianion)

**Figure S2. Optimized conformations of D- and L-penicillamine in  $\text{H}_2\text{O}$  under different pH conditions (The structure models remain at the same state in  $1.9 \leq \text{pH} < 7.9$ , and the models are shown in Figure 3 in the article )**

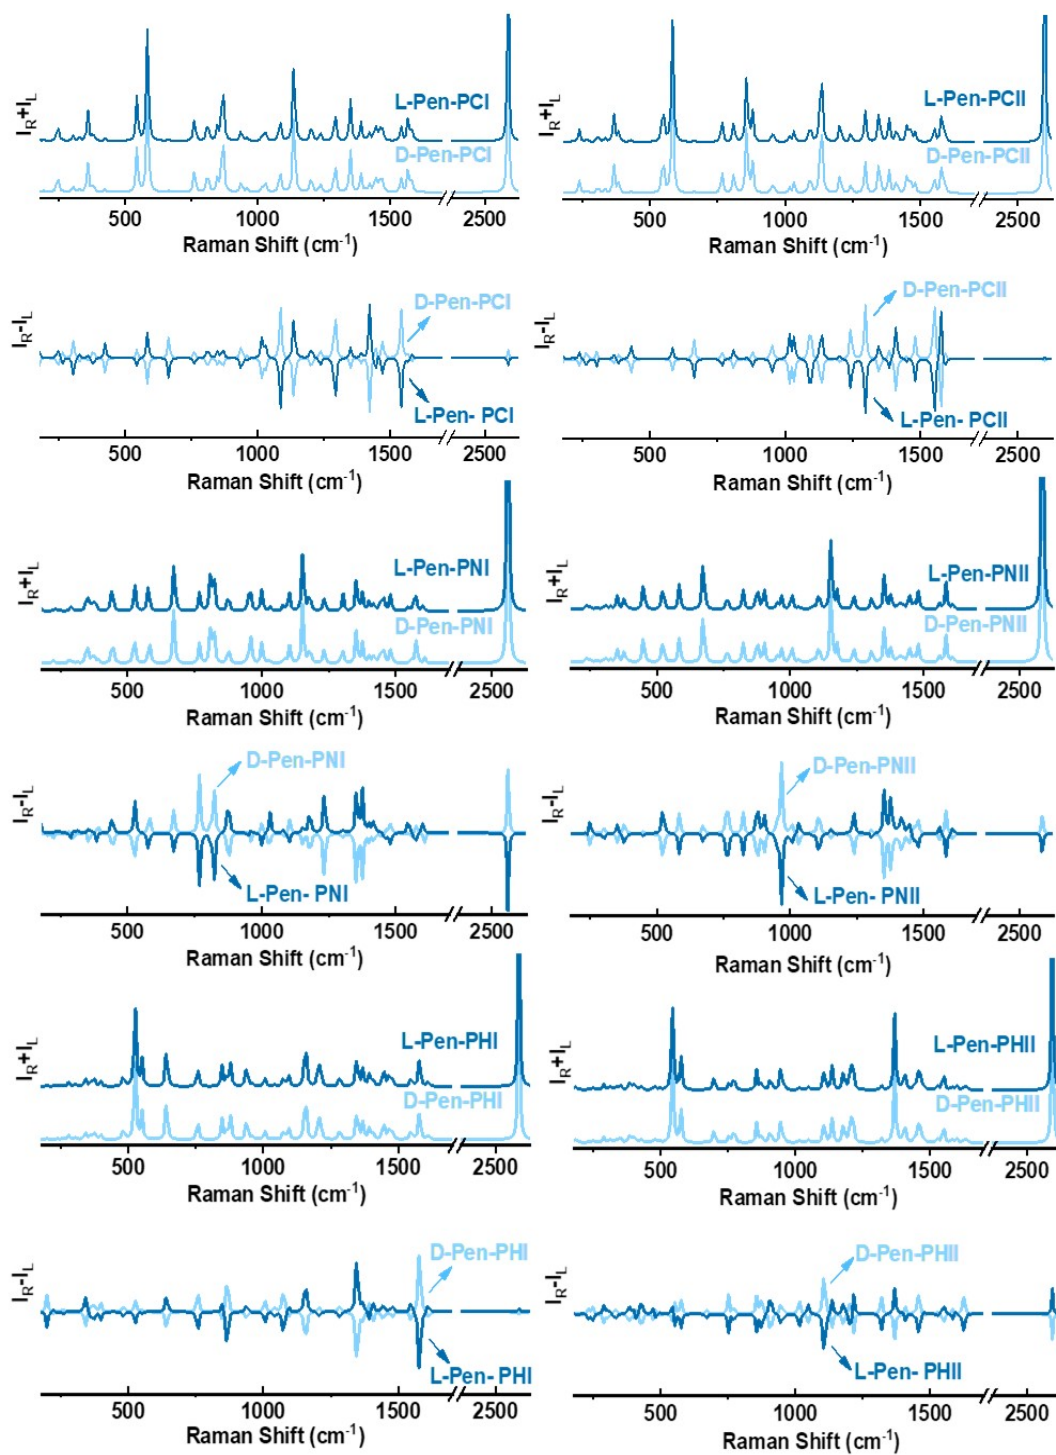

**Figure S3. Raman and ROA theoretical spectra corresponding to the six stable conformations of penicillamine in H<sub>2</sub>O**

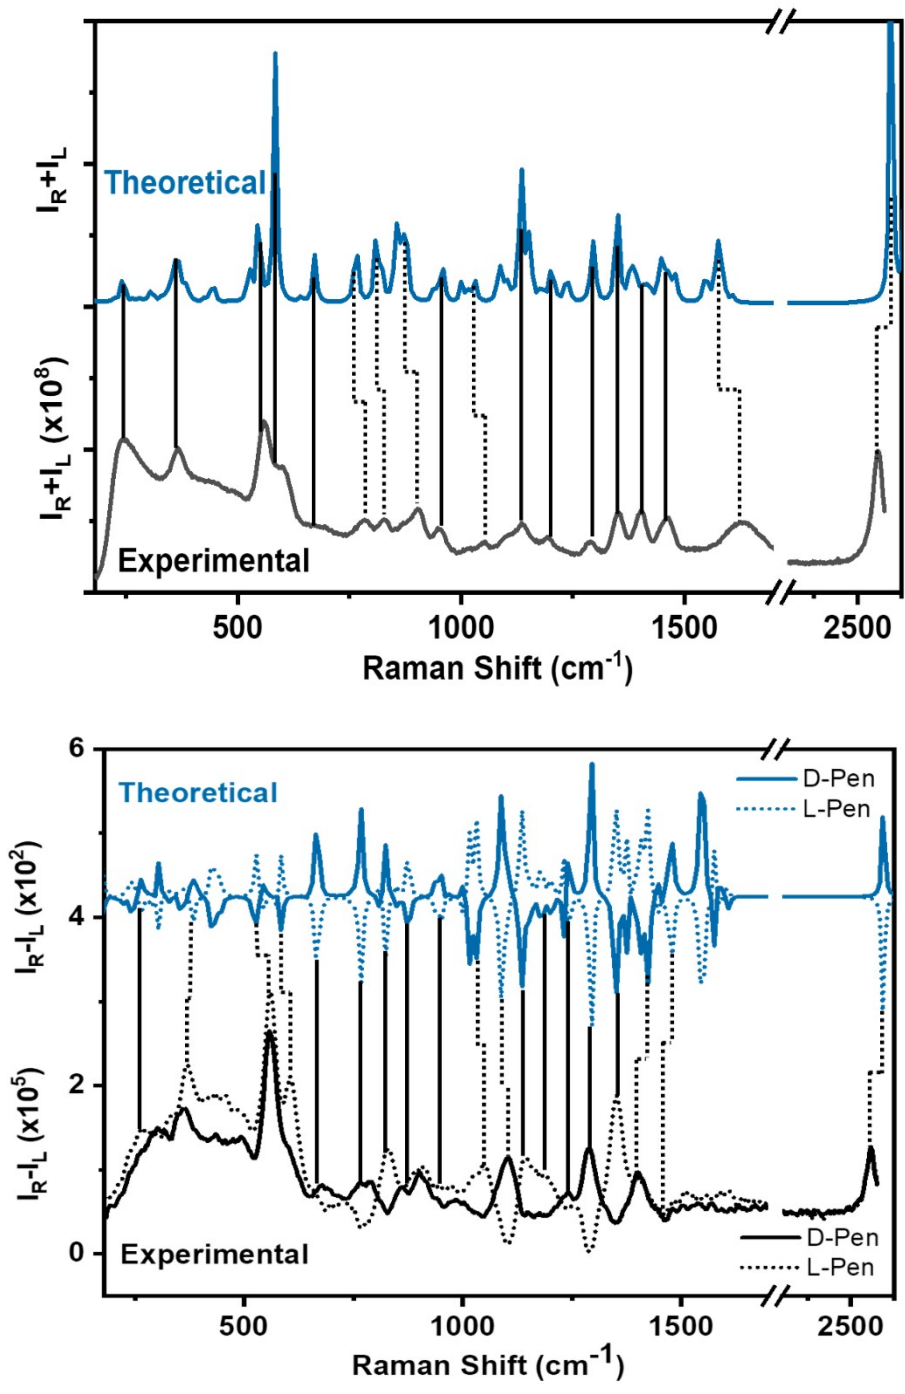

Figure S4. Correspondence peaks between experimental and simulated Raman (D-Pen) and ROA spectra (D-Pen & L-Pen)

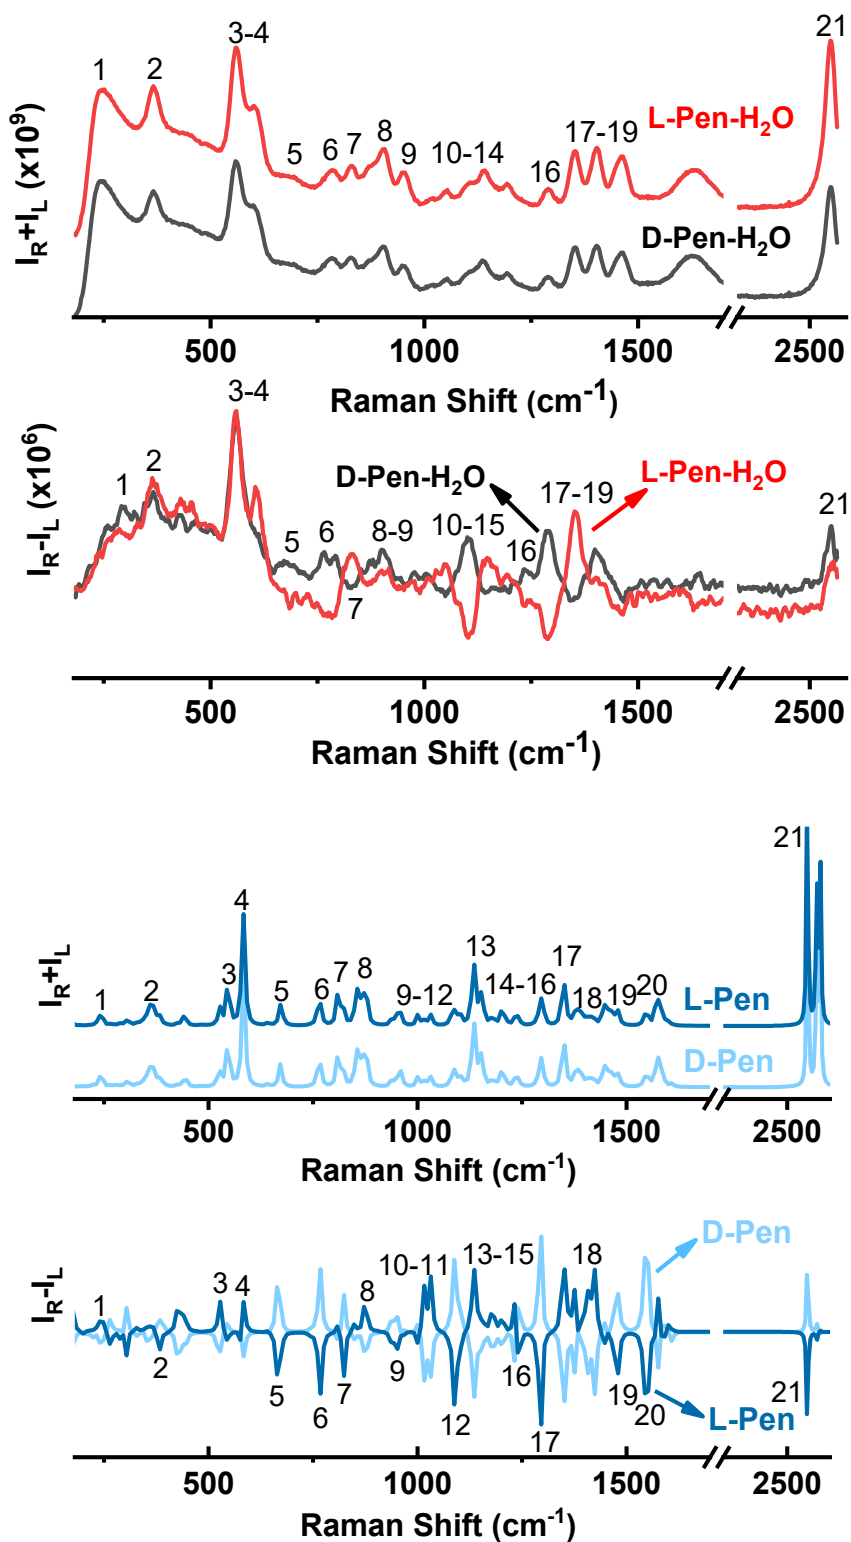

Figure S5. Experimental and theoretical Raman& ROA spectra of penicillamine in H<sub>2</sub>O (Labels in the figure are marked according to the assignment in the table below. Test conditions : pH=5; 1mol/L; 24 mW; 1.029 s; 400 min ; Calculated parameters : B3LYP/aug-cc-PVDZ; SMD)



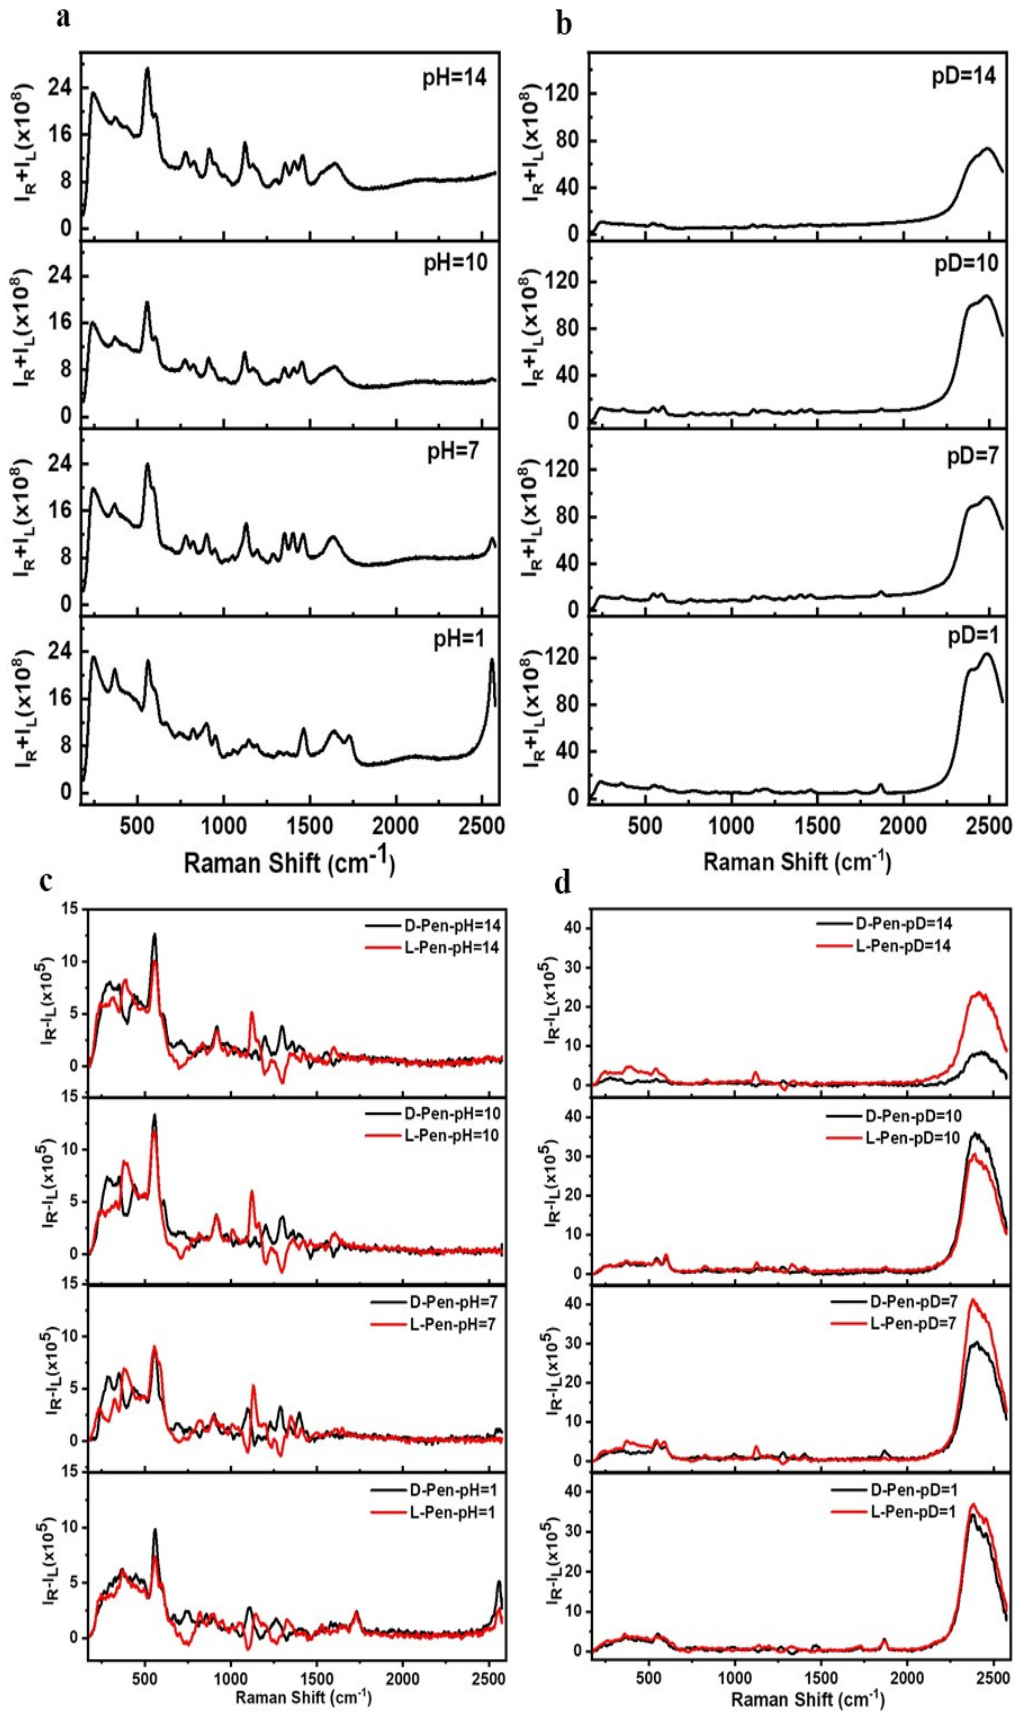

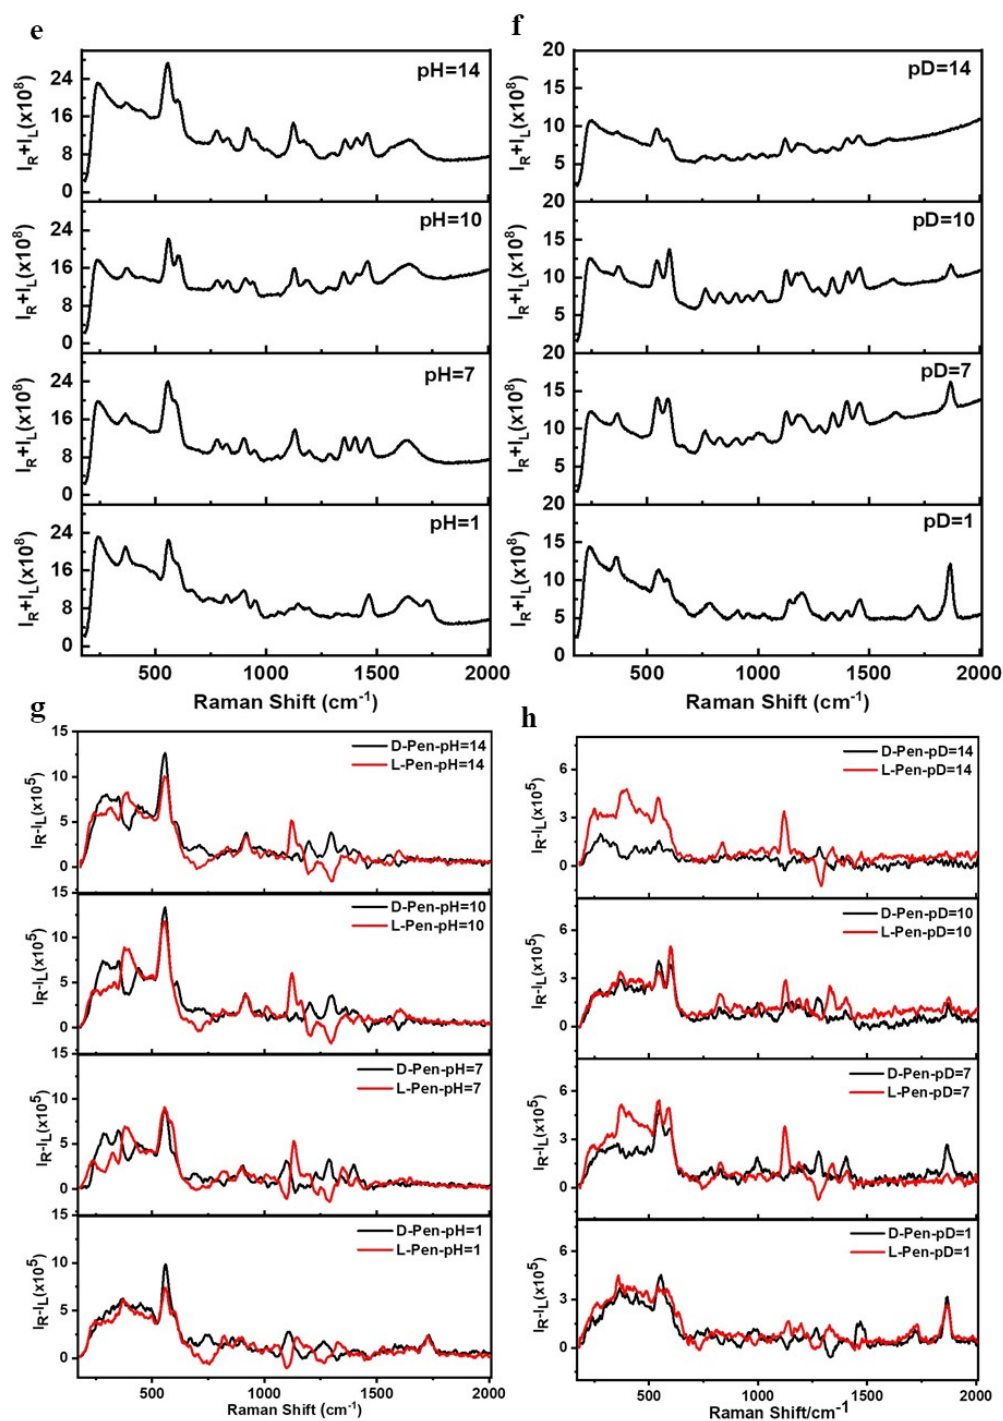

**Figure S6.** (a-b & e-f) Raman spectra of D-penicillamine in H<sub>2</sub>O in pH=1,7,10,14 (Test conditions : 0.75 mol/L; 24 mW; 1.029 s ; 600 min ) and in D<sub>2</sub>O in pD=1,7,10,14 (0.55 mol/L; 24 mW; 1.029 s ; 400 min); (c-d & g-h) ROA experimental spectra of D- and L-penicillamine in H<sub>2</sub>O in pH=1,7,10,14 and in D<sub>2</sub>O in pD=1,7,10,14 ( Test conditions is as the same as Raman test ) ;The wavenumber range of spectra (a,b,c,d) is 180~2600 cm<sup>-1</sup> and the wavenumber range of spectra (e,f,g,h) is 180~2010 cm<sup>-1</sup> and ROA spectra (D-Pen & L-Pen)



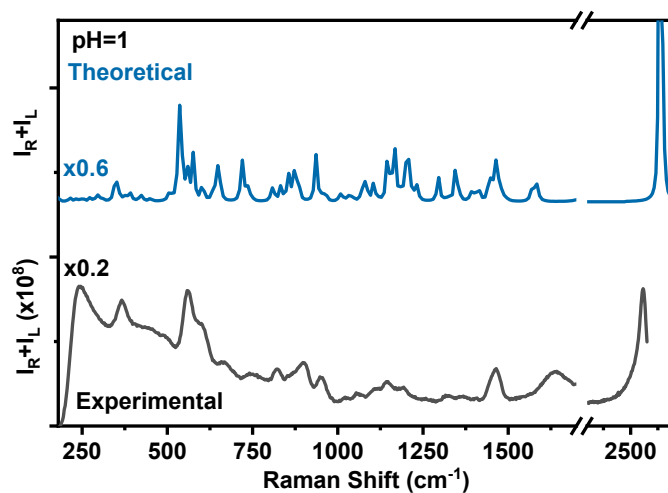

The theoretical and experimental Raman spectra of penicillamine at pH=1

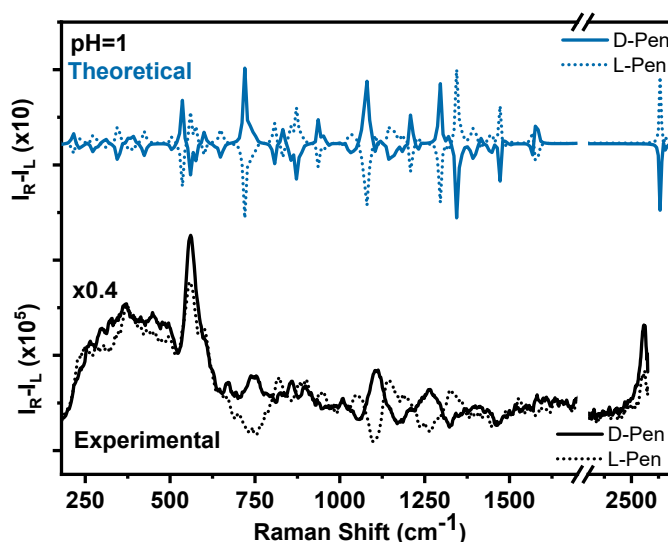

The theoretical and experimental ROA spectra of penicillamine at pH=1

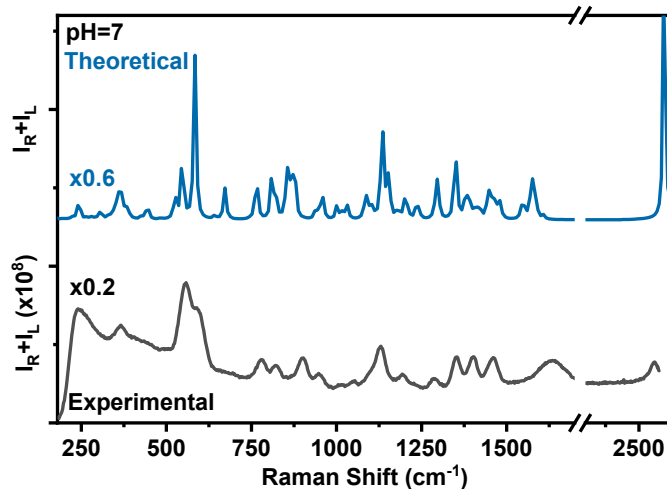

The theoretical and experimental Raman spectra of penicillamine at pH=7

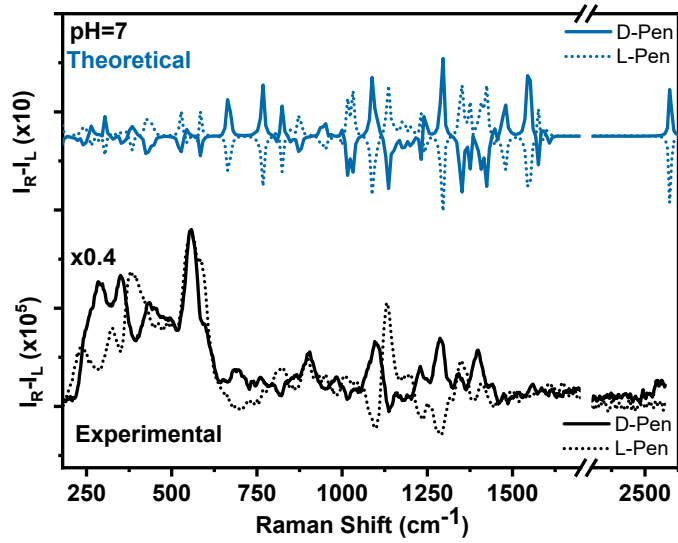

The theoretical and experimental ROA spectra of penicillamine at pH=7

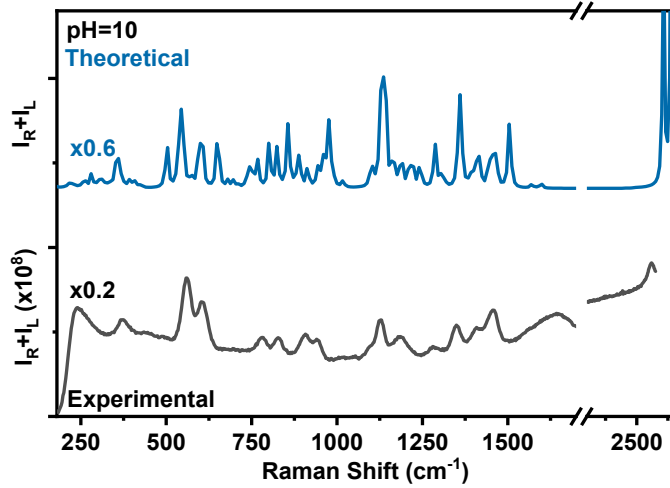

The theoretical and experimental Raman spectra of penicillamine at pH=10

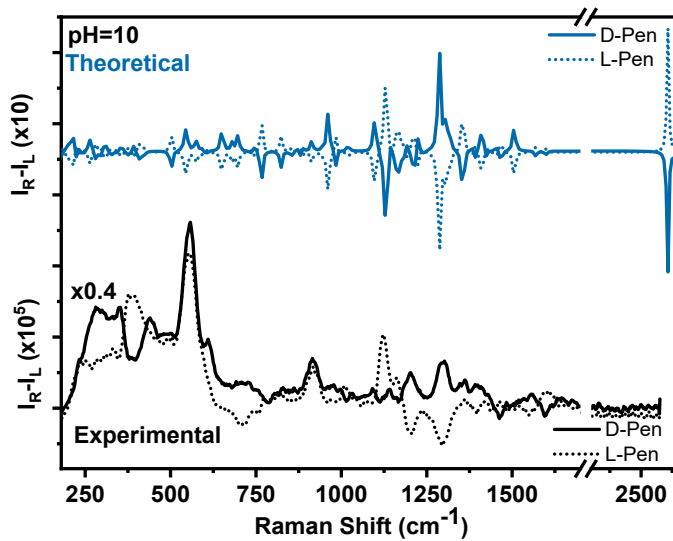

The theoretical and experimental ROA spectra of penicillamine at pH=10

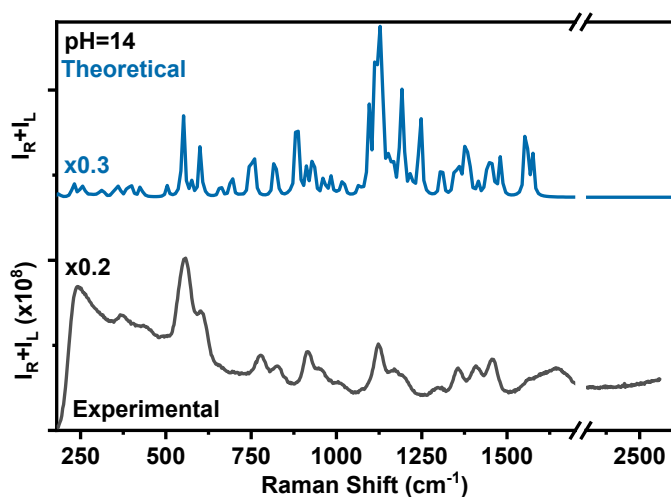

The theoretical and experimental Raman spectra of penicillamine at pH=14

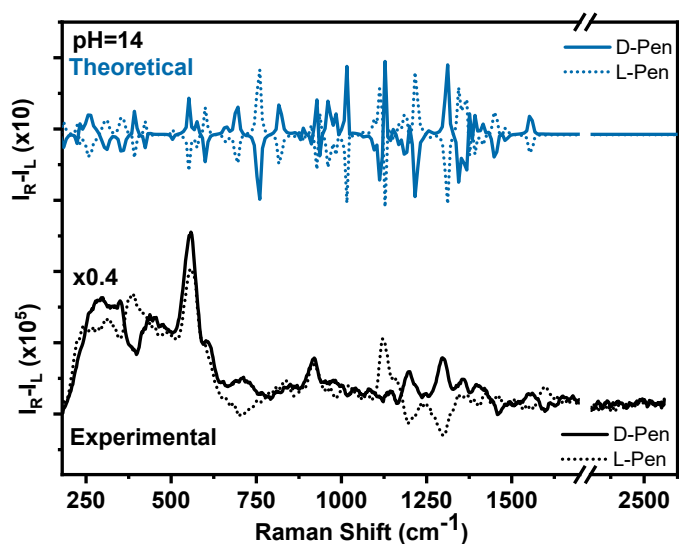

The theoretical and experimental ROA spectra of penicillamine at pH=14

Figure S7. The theoretical and experimental Raman and ROA spectra of penicillamine under different pH conditions (The spectra at pH=7 and pH=5 are identical because of the same zwitterionic state in solution; To better compare the theoretical and experimental peak intensities, some peaks are multiplied by proper scaling factors which are labeled in spectra)

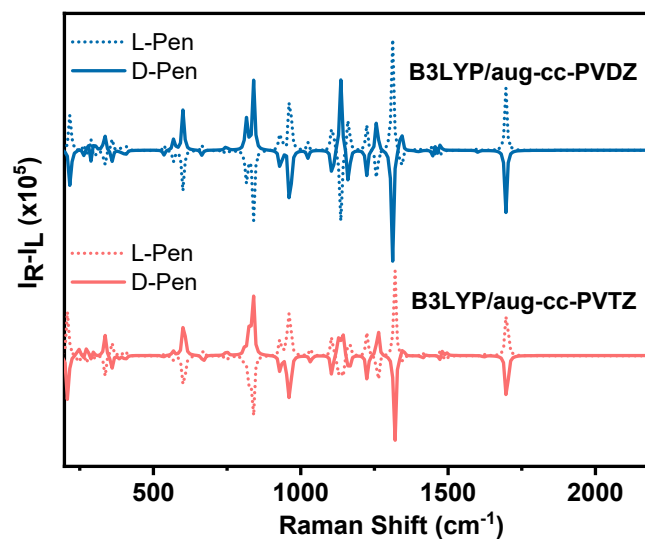

**Figure S8.** The theoretical ROA spectra of the D- and L-penicillamine using B3LYP/aug-cc-PVDZ and B3LYP/aug-cc-PVTZ (Take one of the conformations as the example; The Figure shows that the higher order one (aug-cc-PVTZ) produces similar results to another one (aug-cc-PVDZ), and the blue one (aug-cc-PVDZ) displays more clear peaks, for example, the peaks in the range of  $500\text{ cm}^{-1}$ - $900\text{ cm}^{-1}$ .)

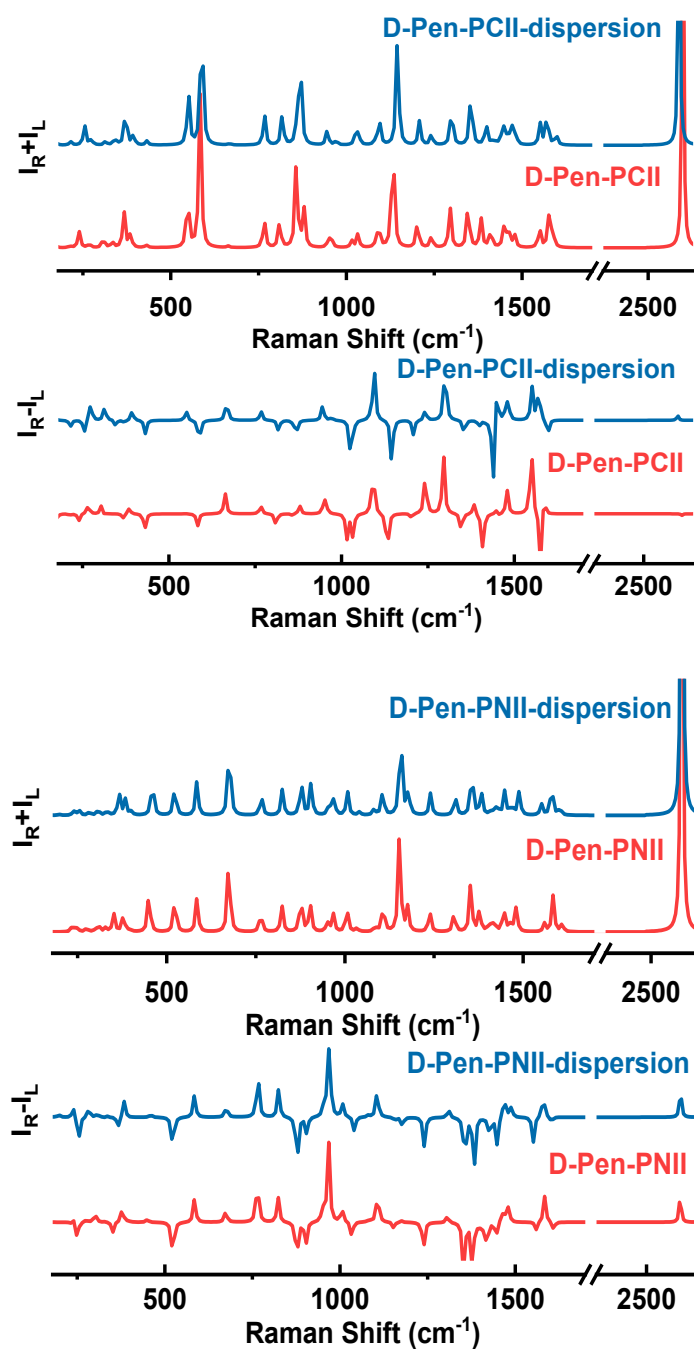

Figure S9. The theoretical Raman and ROA spectra of the D-penicillamine with and without dispersion correction (Take  $P_C^{II}$  and  $P_N^{II}$  conformations as the example and the spectra are both calculated by using B3LYP/aug-cc-PVDZ and SMD. The blue one is the spectra with dispersion correction and the red one is the spectra without dispersion correction.)

We also considered the explicit solvation model (the penicillamine molecule was surrounded by five, water molecules), which implied that interaction between molecules and surroundings. (The optimized models are shown in **Figure S10**. In the fingerprint region, the theoretical results using a single implicit SMD (**Figure S11c**) showed higher agreement with the experimental results (**Figure S11a**) than that with an implicit solvation model and explicit water molecules (**Figure S11b**) in **Figure S11**. And the peaks in **Figure S11b** are more complicated than the peaks in **Figure S11c**. Therefore, only the SMD implicit solvation model was applied to the calculations.

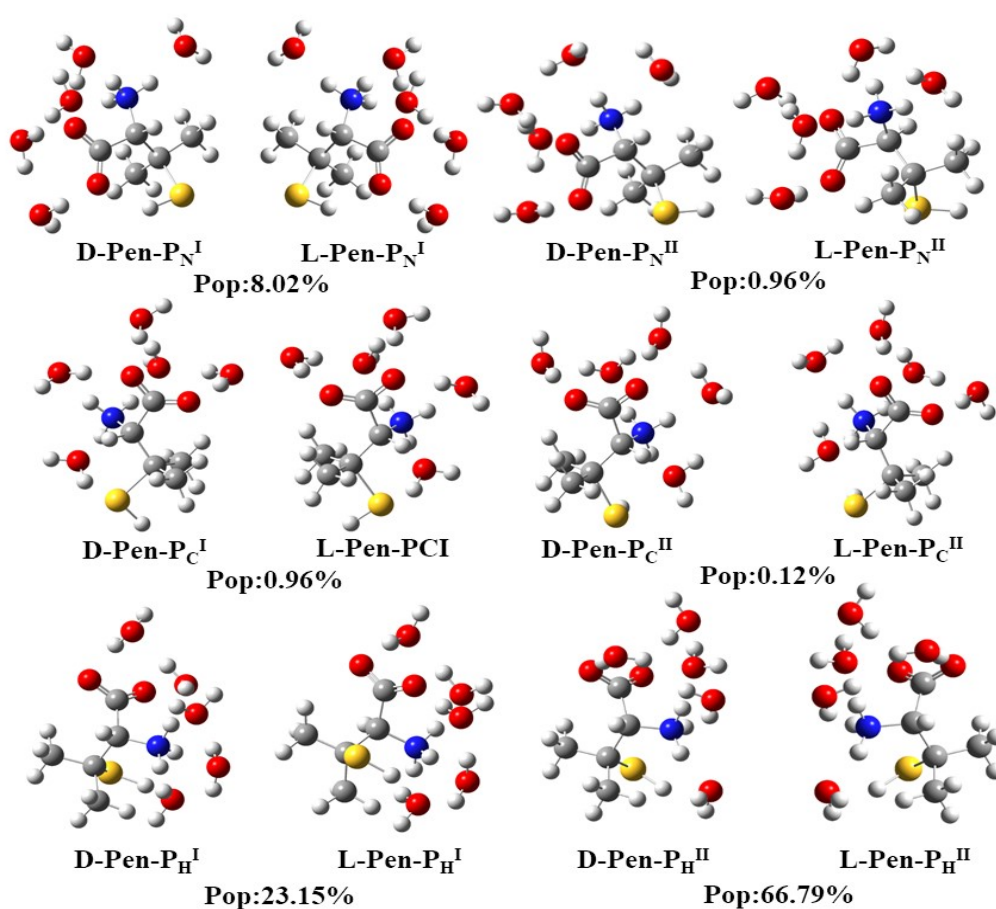

**Figure S10. Optimized conformations of D- and L-penicillamine with implicit solvation model (SMD) and explicit water molecules in H<sub>2</sub>O. (The populations of conformations were labeled in Figure)**

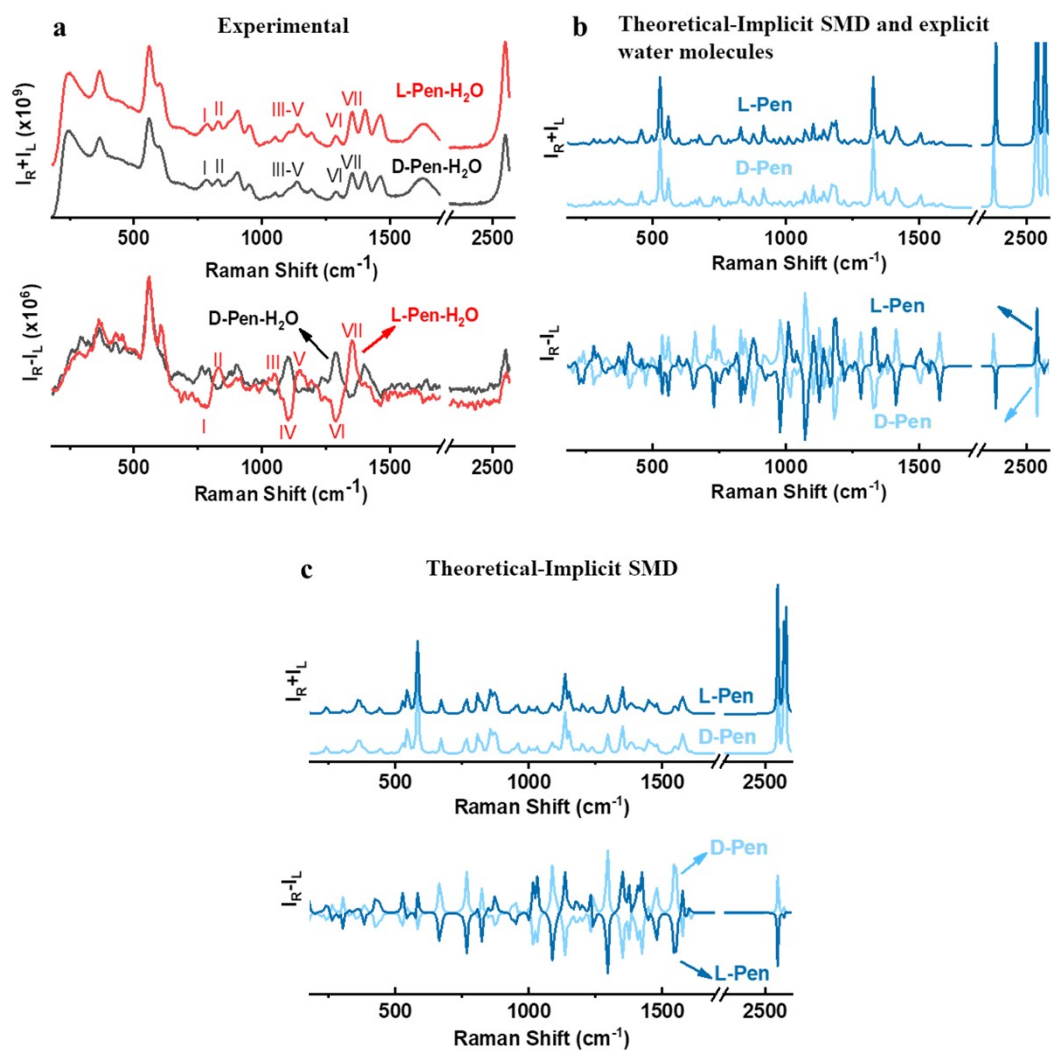

**Figure S11.** The theoretical Raman and ROA spectra of D- and L-penicillamine with different solvation models in H<sub>2</sub>O. (a. The experimental spectra of D-/L- Pen and this is also the Figure 5a; b. The theoretical spectra of D-/L-Pen with implicit solvation model (SMD) and five explicit water molecules; c. The theoretical spectra of D-/L-Pen with only SMD and this is also the Figure 5b.)

**Table S1. Dihedral angles of theoretical six conformations of L-penicillamine**

| conformer   | $\Psi_N^I$ | $\Psi_N^{II}$ | $\Psi_C^I$ | $\Psi_C^{II}$ | $\Psi_H^I$ | $\Psi_H^{II}$ |
|-------------|------------|---------------|------------|---------------|------------|---------------|
| $\Psi_{a1}$ | -171.7     | -175.2        | -59.6      | -63.2         | 64.9       | 60.7          |
| $\Psi_{a2}$ | -47.8      | -51.4         | 64.8       | 61.4          | -174.3     | -178.7        |
| $\Psi_{a3}$ | 74.1       | 68.4          | 179.3      | 177.6         | -52.6      | -59.0         |
| $\Psi_{b1}$ | -49.2      | -52.5         | 61.0       | 57.1          | -171.6     | -178.0        |
| $\Psi_{b2}$ | 74.7       | 71.2          | -174.7     | -178.3        | -50.7      | -57.4         |
| $\Psi_{b3}$ | -163.4     | -169.0        | -60.2      | -62.0         | 70.9       | 62.3          |
| $\Psi_{c1}$ | 66.4       | 63.4          | 178.4      | 175.0         | -55.9      | -60.7         |
| $\Psi_{c2}$ | -169.7     | -172.8        | -57.2      | -60.4         | 65.0       | 59.9          |
| $\Psi_{c3}$ | -47.8      | -53.0         | 57.3       | 55.9          | -173.4     | 179.6         |
| $\Psi_{d1}$ | -49.6      | 145.4         | 94.4       | 139.5         | -87.9      | -160.5        |
| $\Psi_{d2}$ | -167.5     | 27.7          | -29.1      | 18.1          | 151.7      | 79.5          |
| $\Psi_{d3}$ | 73.4       | -93.1         | -148.3     | -102.5        | 34.0       | -40.2         |

**Definition of Torsion angles:**  $\Psi_{a1}(C^1-C^2-C^3-C^5)$ ,  $\Psi_{a2}(C^1-C^2-C^3-C^4)$ ,  $\Psi_{a3}(C^1-C^2-C^3-S^6)$ ;  $\Psi_{b1}(N^7-C^2-C^3-C^5)$ ,  $\Psi_{b2}(N^7-C^2-C^3-C^4)$ ,  $\Psi_{b3}(N^7-C^2-C^3-S^6)$ ;  $\Psi_{c1}(H^9-C^2-C^3-C^5)$ ,  $\Psi_{c2}(H^9-C^2-C^3-C^4)$ ,  $\Psi_{c3}(H^9-C^2-C^3-S^6)$ ;  $\Psi_{d1}(H^8-S^6-C^3-C^2)$ ,  $\Psi_{d2}(H^8-S^6-C^3-C^5)$ ,  $\Psi_{d3}(H^8-S^6-C^3-C^4)$ . The data are recorded via Gauss View 5.0.



**Table S2.  $\Delta G$  and Boltzmann distributions of theoretical conformations of penicillamine under different pH conditions**

| conformer                    | Distribution,%<br>(pH<1.9) |       | Distribution,%<br>(1.9≤pH<7.9) |       | Distribution,%<br>(7.9≤pH<10.7) |       | Distribution,%<br>(pH≥10.7) |       |
|------------------------------|----------------------------|-------|--------------------------------|-------|---------------------------------|-------|-----------------------------|-------|
|                              | D-Pen                      | L-Pen | D-Pen                          | L-Pen | D-Pen                           | L-Pen | D-Pen                       | L-Pen |
| P <sub>N</sub> <sup>I</sup>  | 2.93                       | 2.94  | 28.01                          | 30.48 | 21.01                           | 21.23 | 9.16                        | 9.00  |
| P <sub>N</sub> <sup>II</sup> | 8.28                       | 8.56  | 0.77                           | 0.75  | 10.57                           | 10.48 | 9.22                        | 9.24  |
| P <sub>C</sub> <sup>I</sup>  | 12.69                      | 12.60 | 30.95                          | 29.94 | 40.32                           | 40.31 | 57.04                       | 57.12 |
| P <sub>C</sub> <sup>II</sup> | 12.65                      | 12.67 | 32.94                          | 31.80 | 9.28                            | 9.34  | 1.56                        | 1.57  |
| P <sub>H</sub> <sup>I</sup>  | 56.51                      | 55.93 | 4.35                           | 4.32  | 11.03                           | 10.93 | 0.10                        | 0.10  |
| P <sub>H</sub> <sup>II</sup> | 6.93                       | 7.30  | 2.99                           | 2.71  | 7.78                            | 7.72  | 22.93                       | 22.98 |

**Table S3. Assignments of vibrational modes of penicillamine in H<sub>2</sub>O**

| NO. | Raman |      | ROA<br>(Expt) |         | ROA<br>(Theo) |         | Assignments                                                                   |
|-----|-------|------|---------------|---------|---------------|---------|-------------------------------------------------------------------------------|
|     | Expt  | Theo | D-Pen         | L-Pen   | D-Pen         | L-Pen   |                                                                               |
| 1   | 246   | 240  | 275(+)        | 275(-)  | 240(-)        | 240(+)  | $\beta$ (C-C-S)                                                               |
| 2   | 366   | 360  | 358(+)        | 368(+)  | 360(-)        | 360(+)  | $\beta$ (C-C-C)+ $\beta$ (C-C-S)+ $\nu$ (C-S)                                 |
| 3   | 560   | 544  | 560(+)        | 560(+)  | 544(+)        | 544(-)  | $\nu$ (C*-N)+ $\beta$ (C*-C=O)+ $\nu$ (C-C)                                   |
| 4   | 601   | 584  | 604(-)        | 604(+)  | 584(-)        | 584(+)  | $\nu$ (C-S)+ $\beta$ (C-C-C)+ $\beta$ (C-C-S)                                 |
| 5   | 679   | 672  | 679(+)        | 684(-)  | 664(+)        | 664(-)  | $\nu$ (C-S)+ $\beta$ (COO <sup>-</sup> )+ $\beta$ (C-C-C) + $\beta$ (C-C-S)   |
| 6   | 783   | 768  | 766(+)        | 766(-)  | 768(+)        | 768(-)  | $\beta$ (COO <sup>-</sup> )+ $\nu$ (C*-C)                                     |
| 7   | 832   | 808  | 827(-)        | 827(+)  | 808(-)        | 808(+)  | $\beta$ (COO <sup>-</sup> )+ $\nu$ (C-C)                                      |
| 8   | 902   | 872  | 902(+)        | 902(+)  | 872(-)        | 872(+)  | $\nu$ (C*-C) + $\beta$ (COO <sup>-</sup> )                                    |
| 9   | 947   | 952  | 957(-)        | 957(-)  | 952(+)        | 952(-)  | $\rho$ (CH <sub>3</sub> )+ $\nu$ (C-C)+ $\nu$ (C*-N)                          |
| 10  | 1014  | 1016 | 1014(-)       | 1014(+) | 1016(-)       | 1016(+) | $\nu$ (C*-N)+ $\rho$ (CH <sub>3</sub> )                                       |
| 11  | 1054  | 1032 | 1046(-)       | 1046(+) | 1032(-)       | 1032(+) | $\nu$ (C*-N)+ $\rho$ (NH <sub>3</sub> <sup>+</sup> )                          |
| 12  | 1105  | 1088 | 1105(+)       | 1105(-) | 1088(+)       | 1088(-) | $\rho$ (NH <sub>3</sub> <sup>+</sup> )+ $\beta$ (C*-H)                        |
| 13  | 1142  | 1136 | 1142(-)       | 1142(+) | 1136(-)       | 1136(+) | $\rho$ (CH <sub>3</sub> )                                                     |
| 14  | 1193  | 1200 | 1193(-)       | 1193(+) | 1200(-)       | 1200(+) | $\rho$ (CH <sub>3</sub> )+ $\nu$ (C-C)                                        |
| 15  | /     | 1240 | 1241(+)       | 1241(-) | 1240(+)       | 1240(-) | $\nu$ (C*-C)+ $\nu$ (C-C)+ $\rho$ (CH <sub>3</sub> )                          |
| 16  | 1289  | 1296 | 1289(+)       | 1289(-) | 1296(+)       | 1296(-) | $\beta$ (C*-H)                                                                |
| 17  | 1353  | 1352 | 1351(-)       | 1351(+) | 1352(-)       | 1352(+) | $\nu_s$ (COO <sup>-</sup> )+ $\beta$ (C*-H)                                   |
| 18  | 1403  | 1424 | 1401(+)       | 1401(+) | 1424(-)       | 1424(+) | $\delta_{as}$ (NH <sub>3</sub> <sup>+</sup> )                                 |
| 19  | 1462  | 1480 | 1462(-)       | 1462(-) | 1480(+)       | 1480(-) | $\delta_{as}$ (CH <sub>3</sub> )                                              |
| 20  | /     | 1544 | /             | /       | 1544(+)       | 1544(-) | $\nu_{as}$ (COO <sup>-</sup> )+ $\delta_{as}$ (NH <sub>3</sub> <sup>+</sup> ) |
| 21  | 2557  | 2592 | 2557(+)       | 2557(+) | 2592(+)       | 2592(-) | $\nu$ (S-H)                                                                   |

The peaks represented in the Table are marked in Figure S5.

The Expt represents the experimental data while the Theo represents the Theoretical data.

$\nu$ , stretch;  $\delta$ , deformation;  $\rho$ , rock;  $\omega$ , wag; as, asymmetric; s, symmetric;  $\beta$ , bend.
